# Supplementary material
Source: Research Square preprint supplement (doi:10.21203/rs.3.rs-9149796/v1)
Supplement: Supplementary file 1 [file 617a73e99cd50c14e07944c4.docx]

**Supplementary Material for Systemic Infection and Brain Resilience in Patients With Seizures: An Inverse-Model Hypothesis From a Retrospective Cohort Study**

**Yi-Te Huang1, 2, Tzu-Hsin Huang3, Yu-Shiue Chen4, Ting-Rong Chen5, Sheng-Hsiang Lin1, 6, 7, Chia-Ming Chang2, 8, 9, Chin-Wei Huang4,***

1 Institute of Clinical Medicine, College of Medicine, National Cheng Kung University, Tainan, Taiwan

2 Department of Geriatrics and Gerontology, National Cheng Kung University Hospital, College of Medicine, National Cheng Kung University, Tainan, Taiwan

3 Zhengxin Neurology & Rehabilitation Center, Tainan, Taiwan

4 Department of Neurology, National Cheng Kung University Hospital, College of Medicine, National Cheng Kung University, Tainan, Taiwan

5 Department of Medical Imaging, National Cheng Kung University Hospital, College of Medicine, National Cheng Kung University, Tainan, Taiwan

6 Department of Public Health, College of Medicine, National Cheng Kung University, Tainan, Taiwan

7 Biostatistics Consulting Center, National Cheng Kung University Hospital, College of Medicine, National Cheng Kung University, Tainan, Taiwan

8 Department of Medicine, College of Medicine, National Cheng Kung University, Tainan, Taiwan

9 Institute of Gerontology, College of Medicine, National Cheng Kung University, Tainan, Taiwan

*Correspondence to:

Chin-Wei Huang, MD, PhD

Department of Neurology, National Cheng Kung University Hospital, College of Medicine, National Cheng Kung University

Address: 138 Sheng-Li Rd., Tainan 70428, Taiwan.

E-mail: huangcw@mail.ncku.edu.tw

Phone: 886-6-2353535 ext: 7809

Fax: 886-6-2374285

**Supplementary Material, Table S1**. Searched medical wards and *ICD* Codes for seizure inclusion

| Target ward: Department of Internal Medicine (Division of General Internal Medicine, Chest Medicine, Gastroenterology and Hepatology, Cardiology, Endocrinology, Infectious Diseases, Hematology and Oncology, Nephrology, Allergy, Immunology and Rheumatology, Geriatrics and Gerontology) and Department of Neurology | |
| --- | --- |
| ICD 9 | ICD 10 |
| 345 series  34500  34501  34510  34511  3452  3453  34540  34541  34550  34551  34570  34571  34580  34581  34590  34591  779 series  7790  780 series  78031  78032  78033  78039 | F series  F445  G40A series  G40A01  G40A09  G40A11  G40A19  G40B series  G40B01  G40B09  G40B11  G40B19  G400 series  G40001  G40009  G40011  G40019  G401 series  G40101  G40109  G40111  G40119  G402 series  G40201  G40209  G40211  G40219  G403 series  G40301  G40309  G40311  G40319  G404 series  G40401  G40409  G40411  G40419  G405 series  G40501  G40509  G408 series  G40801  G40802  G40803  G40804  G40811  G40812  G40813  G40814  G40821  G40822  G40823  G40824  G4089  G409 series  G40901  G40909  G40911  G40919  G8384 Todd’s paralysis  R56 series  R5600  R5601  R561  R569  Z series  Z820 |

**Captions:** Additional table 1 lists the searched medical wards and *ICD* codes for seizure inclusion

**Supplementary Material, Table S2**. Collected Data

| Epidemiology and comorbidity | |
| --- | --- |
| Item | Age, sex, Charlson comorbidity index (CCI), epilepsy specific comorbidity index (ESCI) and multimorbidity of major organ systems |
| Approach | Critical review of discharge notes, outpatient notes, laboratory data and image study from electrocardiogram, sonography, computed tomography and magnetic resonance imaging |
| Seizure/Epilepsy | |
| Item | Past history of epilepsy, provoked or unprovoked seizure, seizure onset date and location, semiology, workup of seizure triggers, EEG findings, and ASM prescription (including levetiracetam, valproate, carbamazepine, oxcarbazepine, phenytoin, topiramate, vigabatrin, clonazepam, lamotrigine, zonisamide, phenobarbital, perampanel and clobazam) before and after hospital visit |
| Determination | Consultation of neurologists, neurosurgeons or the detailed description by physicians of other departments through chart review |
| Infection | |
| Location | Any systemic infection other than central nervous system infection, included pneumonia, urinary tract infection, soft tissue (cellulitis, open wound, pressure sore, etc), enteritis/colitis, biliary tract infection, abscess, peritonitis, arthritis, bacteremia / septic shock with or without identifiable primary origin |
| Determination | Clinical judgement recorded in medical records, and confirmed by positive laboratory data and subsequently treated with anti-microbial agents |
| Time window | 3 possible conditions of CSID were held accountable when systemic infection detected (1) concurrently with seizure, (2) after but within 24 hours after seizure onset or (3) seizure occurred in the very systemic infection episode during its treatment course |
| Item | Vital signs, arterial blood gas (ABG), lactate, primary infection site, results of Gram stain, culture or polymerase chain reaction (PCR) of various pathogens, and specimens in accordance with primary site infection or bacteremia, and imaging study relevant to infection survey including but not limited to chest X ray, sonography, computed tomography (CT) and magnetic resonance imaging (MRI) |
| Peri-ictal fever | Critical review of medical records for fever 24 hours before and after from ictal event would be held accountable, otherwise excluded |
| Septic shock | Critical review of medical records for keywords indicating “septic shock” or use of vasopressor agents 24 hours before and after from ictal event would be held accountable, otherwise excluded |
| Brain condition | |
| Determination | Critical review of past history and active problems through medical records, brain CT and MRI |
| Category classification | Recent brain injury, chronic brain injury and developmental anomaly |
| Recent brain injury | Recent stroke (either ischemic or hemorrhagic), brain tumor (either primary or metastatic, excluding non-compressive meningioma), anoxic brain injury |
| Chronic brain injury | Old stroke (either ischemic or hemorrhagic), encephalomalacia, traumatic brain injury or surgical brain injury (craniectomy, craniotomy and shunt) |
| Developmental anomaly | Cortical dysplasia, mesial temporal sclerosis, vascular anomaly and microcephaly |
| Other seizure triggering related data | |
| Item | Blood urea nitrogen, creatinine, sodium, calcium, magnesium, glucose, thyroid-stimulating hormone (TSH) and free T4 |
| Major electrolyte imbalance or abnormal blood sugar | Hypernatremia ≥ 150 mmol/L, hyponatremia ≤ 129 mmol/L, corrected hypocalcemia ≤ 7.5 mg/dL, hypomagnesemia ≤ 0.8 mg/dL, hyperglycemia ≥ 250 mg/dL and hypoglycemia ≤ 70 mg/dL |
| Seizure triggering antimicrobial agents | Critical review of medical records, either judged by neurologist consultation or other physicians, ex: carbapenem (imipenem, ertapenem, meropenem) & cefepime |

**Captions:** Additional table 2 lists the detailed items and criteria for collecting data of epidemiology, comorbidity, seizure, epilepsy, infection, brain condition and other seizure triggering related data

**Supplementary Material, Table S3**. Imaging Study Scoring

| Time window | Within 5 years before and 1 year after the index ictal event |
| --- | --- |
| Time window, proviso | If other intracranial events were recorded in medical records existed between dates of referenced CT and MRI, making obvious discrepancy between CT and MRI, only the imaging study reflecting the real situation based on the temporal relationship of that intracranial event and ictal episode will be included |
| Determination | Integration of formal radiological reports and quantified data by researchers (one neuroradiologist and one neurologist) in this study |
| Included item | |
| Hippocampal atrophy score | |
| Image modality | CT or MRI |
| Adopted criteria | MTA score |
| Rating | |
| 0 | MTA = 0 |
| 1 | MTA = 1-4 |
| MTA: 0 | No CSF visible around the hippocampus |
| MTA: 1 | Slightly widened choroid fissure |
| MTA: 2 | Moderately widened choroid fissure, mildly enlarged temporal horn and mild loss of hippocampal height |
| MTA: 3 | Marked widened choroid fissure, moderately enlarged temporal horn, and moderate loss of hippocampal height |
| MTA: 4 | Markedly widened choroid fissure, marked enlarged temporal horn, markedly atrophied hippocampus and internal structure is lost |
| Visual grading criteria for CT CSVD score | |
| Image modality | CT |
| Semiquantitative rating | |
| 0, normal | Absent hypodense foci |
| 1, mild ischemic load | Hypodense foci ranging from 3mm to 1cm in maximum diameter or periventricular vascular encephalopathy without other isolated focal lesions |
| 2, moderate ischemic load | Converging hypodense foci that form patches of more than 1 cm but no more than 2 cm in maximum diameter |
| 3, severe ischemic load | Diffuse hypodensity in white matter with affected areas larger than 2 cm in maximum diameter |
| MRI CSVD score (STRIVE protocol, in axial view) | |
| Item |  |
| 1. WMHI | |
| Criteria | Fazekas score |
| Series and signal | T2 FLAIR hyper-intensity, T1 iso- or hypo-intensity |
| Location | Deep and periventricular white matter |
| Semiquantitative rating | |
| Deep white matter | |
| 0 | Absent |
| 1 | Punctate focus |
| 2 | Mild confluence |
| 3 | Diffuse confluence |
| Periventricular white matter | |
| 0 | Absent |
| 1 | Ventricular cap or pencil-thin lining |
| 2 | Halo-like abnormal signal |
| 3 | Abnormal signal extending into deep white matter |
| 1. CM | |
| Series and signal | GRE or SWI or SWAN hypo-intensity |
| Location | Deep white matter or cerebral cortex |
| Definition | Small (<5 mm), homogeneous, round foci of low signal intensity on GRE or SWI or SWAN in cerebellum, brainstem, BG, white matter, or cortico-subcortical junction, differentiated from vessel flow voids and mineral depositions in the globi pallidi |
| Quantitative measure | Count of total microbleeds |
| Semiquantitative rating |  |
| 0 | Absence of microbleeds |
| 1 | Presence of any microbleeds |
| 1. EPVS | |
| Series | T2 hyper-intensity and T1-hypo-intensity |
| Location | BG and CS |
| Definition | Small (<3 mm) punctate (if perpendicular) and linear (if longitudinal to the plane of scan) hyper-intensities on T2 images in the BG or CS |
| Semiquantitative rating (for both BG and CS) | |
| 0 | no EPVS |
| 1 | < 10 EPVS |
| 2 | 11 to 20 EPVS |
| 3 | 21 to 40 EPVS |
| 4 | > 40 EPVS |
| 1. Lacunae |  |
| Series | T2 hyper-intensity and T1 hypo-intensity (or hypo-density in CT if MRI unavailable) |
| Definition | Subcortical, rounded or ovoid, fluid-filled (similar signal as CSF) cavity, between 3 to 15mm in diameter, in the territory of one perforating arteriole |
| Quantitative measure | Count of total lacunae |
| Total MRI CSVD score | 0-4 |
| Rating | |
| WHL (Deep Fazekas 2-3 or Periventricular Fazekas 3) | 1 |
| CM (Present) | 1 |
| PVS (BG semiquatitative 2-4) | 1 |
| Lacunes (Present) | 1 |

**Captions:** Additional table 3 lists the detailed items and criteria of imaging study inclusion, hippocampal atrophy scoring, CT CSVD scoring, MRI CSVD scoring and total MRI CSVD scoring

* ADC: Apparent diffusion coefficient, ASM: Antiseizure medication; BG: Basal ganglion, CM: cerebral microbleed, CS: Centrum semiovale, CSF: Cerebrospinal fluid, CSVD: cerebral small vessel disease, CT: Computed tomography, DWI: Diffusion-weighted imaging, EEG: Electroencephalogoraphy, EPVS: Enlarged perivascular space, FLAIR: Fluid-attenuated inversion recovery, GRE: Gradient echo, MRI: magnetic resonance imaging, MTA: Medial temporal atrophy, STRIVE: STandards for Reporting and Imaging of Small Vessel Disease, SWAN: Susceptibility-weighted angiography, SWI: Susceptibility weighted imaging, WMHI: White matter hyper-intensity.
